# Supplementary material for: Rosmarinic acid alleviates cardiomyocyte apoptosis via cardiac fibroblast in doxorubicin-induced cardiotoxicity
Source: PubMed Central journal article supplement — Int J Biol Sci. 2019 Jan 1;15(3):556–67. doi: 10.7150/ijbs.29907 (PMC6367577; doi:10.7150/ijbs.29907), 2019-01-01
Supplement: ijbsv15p0556s1.pdf [file ijbsv15p0556s1.pdf]

**Table S1: Echocardiographic and biometric properties of mice in different groups.**

| Parameter  | NS+Veh<br>(n=8) | NS+RA<br>(n=8) | DOX+Veh<br>(n=8) | DOX+RA<br>(n=8)         |
|------------|-----------------|----------------|------------------|-------------------------|
| HR (bpm)   | 496.25±20.22    | 500.25±19.51   | 429.63±13.99*    | 437.63±11.52            |
| FS (%)     | 41.25±1.46      | 40.75±2.28     | 28.50±0.78*      | 39.88±0.91 <sup>#</sup> |
| EF (%)     | 78.50±1.50      | 77.25±2.48     | 61.25±2.71*      | 74.38±1.12 <sup>#</sup> |
| LVIDd (mm) | 3.96±0.05       | 4.05±0.10      | 3.25±0.06*       | 3.84±0.07 <sup>#</sup>  |
| LVIDs (mm) | 2.32±0.08       | 2.43±0.15      | 2.25±0.06*       | 2.31±0.04 <sup>#</sup>  |
| IVSd (mm)  | 0.80±0.01       | 0.81±0.02      | 0.79±0.02        | 0.80±0.02               |
| IVSs (mm)  | 1.18±0.04       | 1.19±0.04      | 0.96±0.03*       | 1.11±0.03 <sup>#</sup>  |
| LVPWd (mm) | 0.88±0.01       | 0.87±0.02      | 0.87±0.03        | 0.86±0.03               |
| LVPWs (mm) | 1.25±0.02       | 1.28±0.03      | 1.01±0.03*       | 1.18±0.03 <sup>#</sup>  |
| SBP (mmHg) | 111.97±4.25     | 106.85±6.33    | 87.92±5.38*      | 91.27±6.56              |
| DBP (mmHg) | 83.19±3.27      | 82.52±4.09     | 67.59±2.28*      | 66.93±3.49              |

HR, heart rate; FS, fractional shortening; EF, ejection fraction; LVIDd, left ventricular end diastolic dimension; LVIDs, left ventricular end systolic dimension; IVSd, interventricular septal thickness at diastole; IVSs, interventricular septal thickness at systole; LVPWd, left ventricular posterior wall thickness at end-diastole; LVPWs, left ventricular posterior wall thickness at end-systole; SBP, systolic blood pressure; DBP, diastolic blood pressure

Figure S1

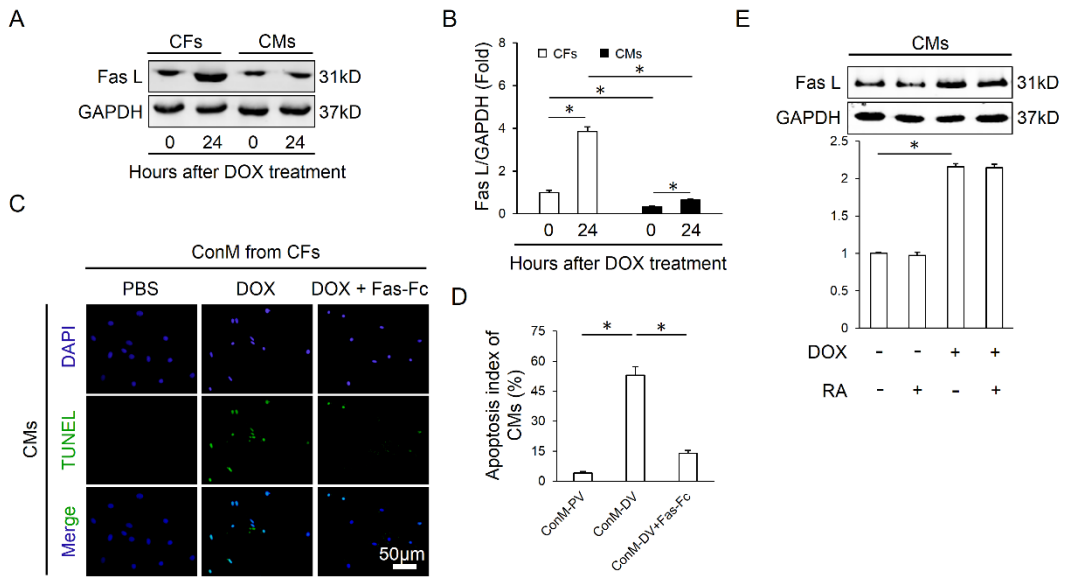

**Figure S1. Role of Fas L in mediating DOX-induced cardiotoxicity.** (A-B) Western blot and statistical results of DOX-induced Fas L expression in cardiomyocytes (CMs) and cardiac fibroblasts (CFs) (n=4). (C-D) Representative TUNEL images and statistical results of conditioned medium (ConM) from cardiac fibroblasts (CFs) on cardiomyocyte apoptosis. Cardiomyocytes (CMs) were incubated for another 24h in ConM prepared from CFs pretreated with Fas-Fc (10 $\mu$ g/ml) 16 hours followed by DOX (1 $\mu$ M) for 8h, and then immunostained for TUNEL assay in CMs (n=4). (E) Fas L protein level in DOX-treated CMs with or without RA protection (n=4). Values represent the mean $\pm$ SEM. \* $P$ <0.05 versus the matched control.
